# Supplementary material
Source: MDPI journal article supplement (https://www.mdpi.com/2571-9408/2/4/166)
Supplement: s1 [file s1]

Supplementary Materials

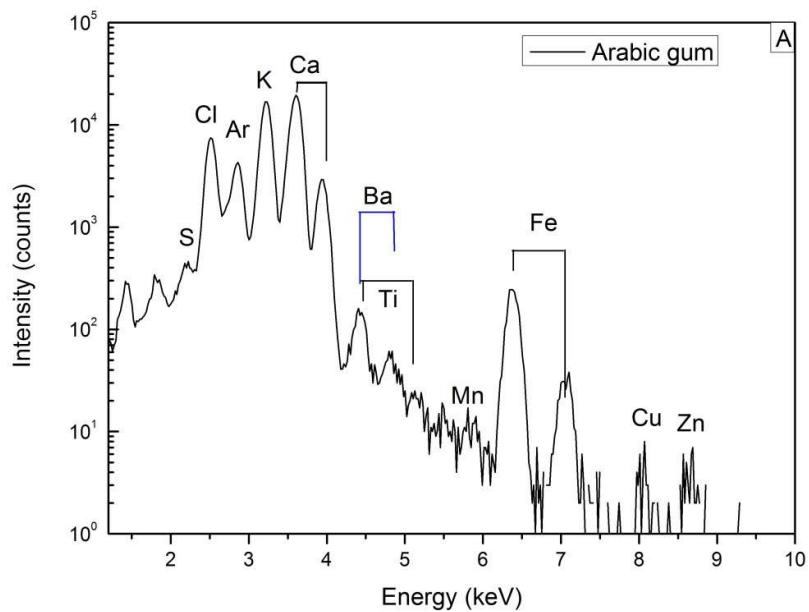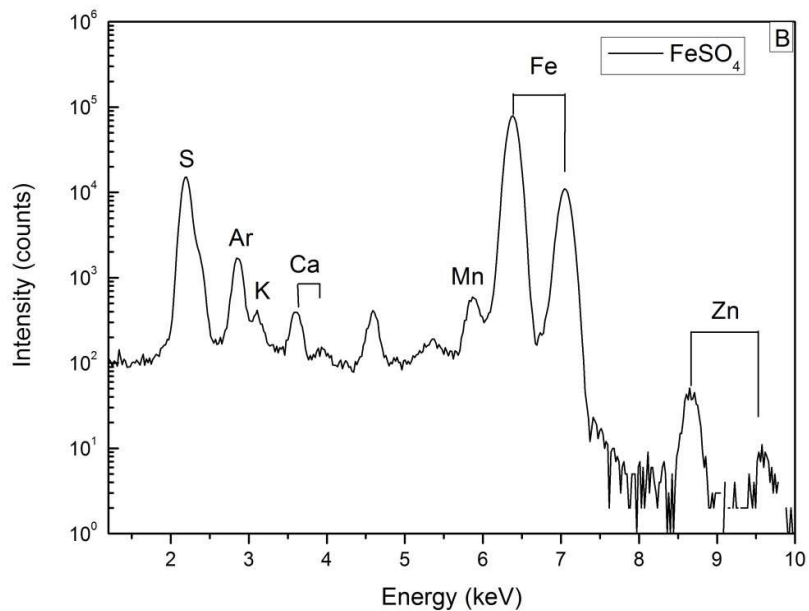

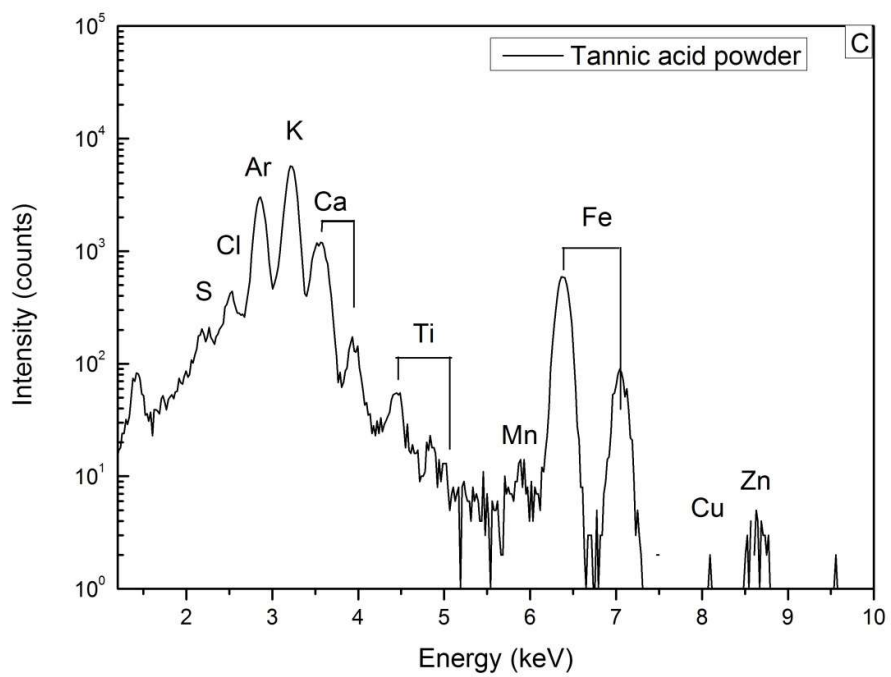

**Figure S1.** PIXE spectra of the ingredients. (A) Arabic gum; (B) iron sulfate; (C) tannic acid powder.

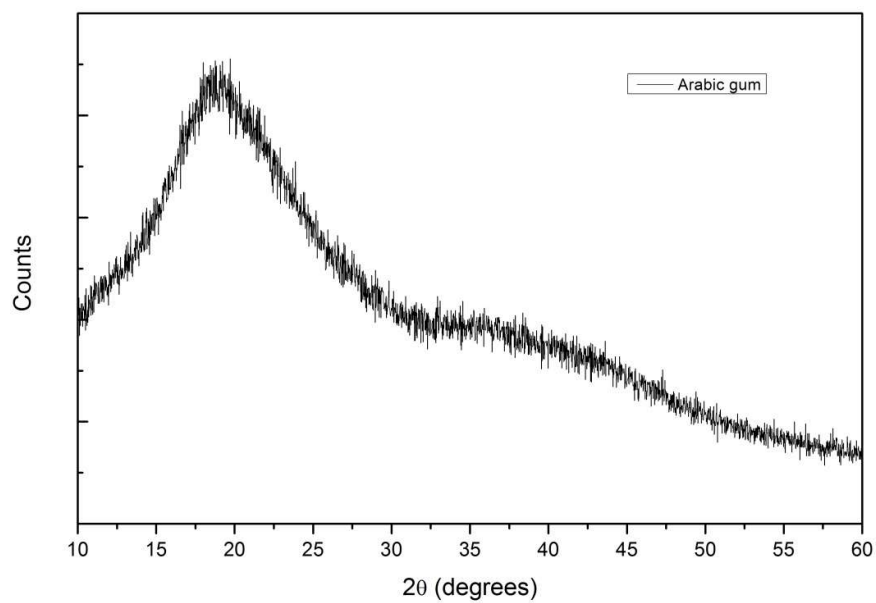

**Figure S2.** XRD diffractogram for Arabic gum.

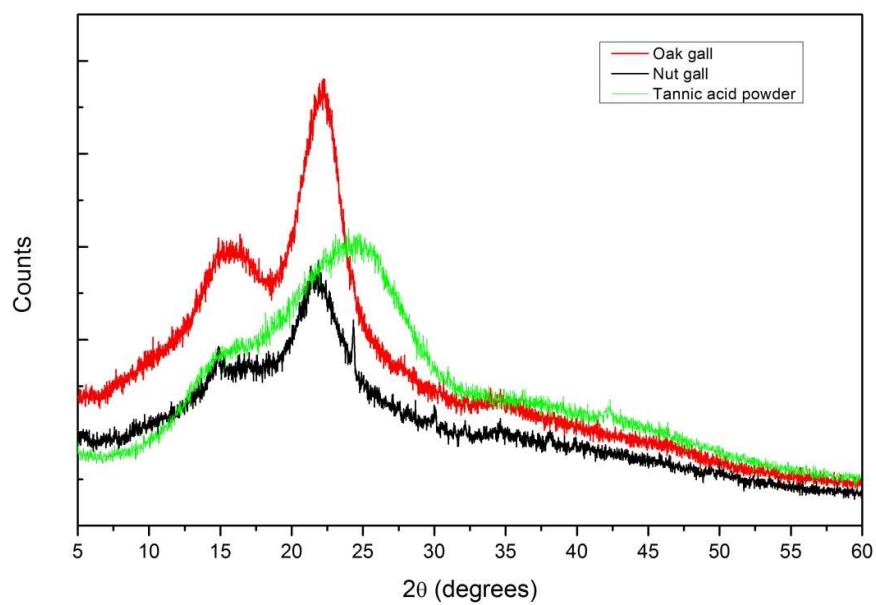

**Figure S3.** XRD diffractograms for tannin sources.
